# Supplementary material
Source: Elsevier journal article supplement (https://www.sciencedirect.com/science/article/pii/S021391111930175X)
Supplement: mmc1 [file S021391111930175X:mmc1.pdf]

## Apéndice 1

### La evaluación económica de intervenciones sanitarias en España

En España, el papel real de la evaluación económica de intervenciones sanitarias en la toma de decisiones ha sido muy limitado, y en absoluto puede considerarse un proceso sistemático o generalizado. La reiterada demanda por parte de entidades profesionales y académicas del ámbito de la salud de que las decisiones de financiación pública de intervenciones sanitarias se basen también en el criterio de eficiencia no ha modificado sustancialmente la situación<sup>1-3</sup>. En el caso de los medicamentos, el criterio de eficiencia no ha tenido, hasta el momento, un papel relevante en las decisiones centrales sobre reembolso, coordinadas por el Ministerio de Sanidad, Consumo y Bienestar Social.

Durante el proceso de revisión del manuscrito, el Consejo de Ministros del Gobierno de España acordó crear el Comité Asesor para la financiación de la prestación farmacéutica del Sistema Nacional de Salud, en el seno del Ministerio de Sanidad. En el momento de escribir estas líneas, el Comité ha sido constituido, lo cual es una señal favorable al uso de la información procedente de evaluaciones económicas en el campo de las decisiones sobre materia de financiación pública y precio de los medicamentos. No obstante, su actividad y sus resultados deberán ser analizados en futuras investigaciones.

En el caso de las tecnologías no farmacológicas sí podemos identificar avances recientes. En el año 2012 se creó la Red Española de Agencias de Evaluación de Tecnologías Sanitarias y Prestaciones del Sistema Nacional de Salud (RedETS), con el objetivo de «generar, difundir y facilitar la implementación de información destinada a fundamentar la toma de decisiones en el Sistema Nacional de Salud, contribuyendo al incremento de la calidad, equidad, eficiencia y cohesión en el mismo» ([www.redets.mscbs.gob.es](http://www.redets.mscbs.gob.es)). La RedETS ha elaborado un buen número de informes de evaluación de tecnologías sanitarias, guías de práctica clínica y

documentos de apoyo metodológico. Ocasionalmente, algunos de estos informes han servido de base para la incorporación de determinados programas y tecnologías en el ámbito autonómico o nacional<sup>4</sup>. Sin embargo, la creciente actividad de la RedETS no se ha acompañado de una utilización sistemática del criterio de eficiencia en la incorporación de intervenciones sanitarias no farmacológicas por el Sistema Nacional de Salud.

## Bibliografía

1. Asociación de Economía de la Salud (AES). Posición de la Asociación de Economía de la Salud en relación a la necesidad de un mayor uso de la evaluación económica en las decisiones que afectan a la financiación pública de las prestaciones y tecnologías en el Sistema Nacional de Salud. 2008.
2. Sociedad Española de Salud Pública y Administración Sanitaria (SESPAS). Posicionamiento SESPAS sobre inclusión de medicamentos en la financiación pública del Sistema Nacional de Salud y fijación de precios. 2017. Disponible en: <http://sespas.es/2017/02/23/posicionamiento-sespas-sobre-inclusion-de-medicamentos-en-la-financiacion-publica-del-sistema-nacional-de-salud-y-fijacion-de-precios/>
3. Organización Médica Colegial (OMC). Informe sobre el sector farmacéutico. 2014. Disponible en: [https://www.cgcom.es/sites/default/files/informe\\_omc\\_sector\\_farmaceutico\\_oct\\_2014.pdf](https://www.cgcom.es/sites/default/files/informe_omc_sector_farmaceutico_oct_2014.pdf)
4. Giménez E, García L, Márquez S, et al. Once años de evaluaciones económicas de productos sanitarios en RedETS. Calidad metodológica e impacto del coste-utilidad. **Gac Sanit. 2019; en prensa.**
