# Supplementary material
Source: Elsevier journal article supplement (https://www.sciencedirect.com/science/article/pii/S021391111930175X)
Supplement: mmc2 [file S021391111930175X:mmc2.pdf]

## **Apéndice 2**

### **Evaluación económica de intervenciones sanitarias: ¿qué hemos aprendido hasta ahora?**

El presente anexo incluye información adicional que, por motivos de espacio, no ha podido incluirse en la sección correspondiente. A continuación, se aportan detalles de: 1) la experiencia internacional más relevante sobre el uso de la evaluación económica de intervenciones sanitarias; 2) las ventajas e inconvenientes de los distintos métodos utilizados para calcular los umbrales de eficiencia; y 3) datos complementarios sobre la aplicación de los umbrales de eficiencia.

#### ***Experiencia internacional con el uso de la evaluación económica de intervenciones sanitarias***

Por su relevancia, es obligado empezar mencionando la experiencia del Reino Unido y el National Institute for Health and Clinical Excellence (NICE). En 2004, a los 5 años de la creación del NICE, el análisis de sus decisiones<sup>1</sup> llevó a que dicho organismo hiciera explícitos unos umbrales de 20.000 y 30.000 libras por año de vida ajustado por calidad (AVAC)<sup>2</sup>, de forma que, por debajo de la primera cifra, la recomendación sería favorable a la cobertura y la financiación de la tecnología, mientras que por encima de la segunda sería desfavorable. Tanto en la filosofía de este doble umbral como en su aplicación práctica se aprecia una gradualidad en las decisiones: el porcentaje de rechazos aumenta a medida que el coste-efectividad es mayor, teniendo en cuenta la existencia de factores como la gravedad de la enfermedad, la existencia de alternativas, la prevalencia y el impacto presupuestario, el impacto en colectivos especialmente susceptibles, las enfermedades raras, los tratamientos al final de la vida o la existencia de innovaciones significativas<sup>2</sup>.

Un estudio retrospectivo de las decisiones adoptadas por el NICE mostró que el criterio de coste-efectividad ha tenido una alta influencia en las decisiones y predice el 82% de estas<sup>3</sup>. Además, el estudio constata que se rechazaron el 50% de las intervenciones cuyo coste-efectividad incremental estuvo por encima de 40.000 libras por AVAC, y que la zona en que la probabilidad de rechazo empezaba a superar a la de recomendación se situaba entre 39.000 y 44.000 libras por AVAC<sup>3</sup>. Esto indica que, además de la eficiencia, el resto de los factores tienen un peso importante, lo que hace que, con frecuencia, se recomienden intervenciones cuyo coste-efectividad incremental se encuentra por encima del umbral superior, y también que se rechacen otras con un coste-efectividad incremental por debajo del umbral inferior.

La vía a las excepciones se abrió explícitamente en 2009, cuando el NICE estableció un protocolo para tratamientos al final de la vida, en el cual, para las enfermedades graves (fundamentalmente pacientes con cáncer), con una esperanza de vida inferior a 24 meses, en los que la nueva intervención supusiera una supervivencia adicional de al menos 3 meses, se incrementaba el valor del coste por AVAC, estableciendo para estos pacientes un umbral superior de 2,5 veces el valor del umbral inferior de eficiencia, es decir, 50.000 libras por AVAC<sup>4,5</sup>. La decisión de establecer diferentes umbrales para situaciones especiales es un tema controvertido. Por un lado, podría justificarse por la diferente valoración social respecto al valor de un AVAC en función de la naturaleza y la gravedad de la enfermedad considerada. Sin embargo, tal diferenciación plantea problemas éticos, pues implica que los AVAC de algunas enfermedades valen más que los de otras, lo que contradice el clásico principio de «un AVAC es un AVAC»<sup>6</sup>, además de contribuir a un incremento efectivo del umbral máximo empleado hasta entonces y reducir el presupuesto sanitario disponible para otras enfermedades<sup>7</sup>.

En 2011, el National Health Service creó la Cancer Drugs Fund para facilitar el acceso de los pacientes a fármacos no evaluados por el NICE o que no hubieran obtenido una recomendación positiva para su uso sistemático. Dicha medida, revisada en 2016, ha supuesto un incremento en las recomendaciones de los

fármacos oncológicos, que actualmente llegan al 79%<sup>5</sup>. Posteriormente, se planteó un proceso de evaluación rápida (*fast track appraisal*) para aquellos fármacos cuyo coste-efectividad incremental estuviera por debajo de 10.000 libras por AVAC, y en 2017 el NICE adoptó un umbral superior de entre 100.000 y 300.000 libras por AVAC para los fármacos indicados para enfermedades muy raras. Dicho límite supera en 10 veces el umbral habitual<sup>8,9</sup>.

Merece la pena mencionar en este apartado un importante trabajo empírico de valoración de los AVAC en el Reino Unido, realizado por Claxton et al<sup>10</sup>. Dicho trabajo, que utiliza un enfoque basado en la oferta, estima el valor de un AVAC en función del coste de oportunidad. Basándose en la situación de áreas sanitarias con presupuestos fijos asignados, el estudio calcula el valor de un AVAC teniendo en cuenta la pérdida de salud que se produce cuando dejan de estar disponibles recursos sanitarios de intervenciones financiadas para pagar el coste incremental de nuevas intervenciones. El valor del AVAC, y por tanto el umbral de coste-efectividad incremental propuesto, utilizando este método se sitúa en 13.000 libras por AVAC.

Debido a las peculiaridades de su cultura y su sistema sanitario, el Gobierno de los Estados Unidos se ha opuesto al uso de la evaluación económica de intervenciones sanitarias. Por ejemplo, el programa Medicare no considera el coste-efectividad para cubrir el coste de un tratamiento, y el Gobierno Federal, a través de la *Affordable Care Act*, prohíbe al Patient Centered Outcomes Research Institute considerar el coste-efectividad en sus recomendaciones<sup>11,12</sup>. Sin embargo, el renovado interés de las aseguradoras privadas por la evaluación de tecnologías sanitarias explica que el Institute for Clinical and Economic Review (ICER), una organización privada sin ánimo de lucro ni responsabilidad regulatoria o de reembolso, se haya convertido en el organismo de referencia para la evaluación del valor de los fármacos (una especie de NICE estadounidense)<sup>13,14</sup>. Inicialmente, el ICER propuso unos umbrales de entre 100.000 y 150.000 dólares por AVAC, y luego amplió el rango para considerar como «intervenciones de alto valor» aquellas cuyo coste-efectividad incremental esté por debajo de 50.000 dólares por AVAC, y como

«intervenciones de bajo valor» aquellas cuyo coste-efectividad incremental supere los 175.000 dólares por AVAC. Se trata de un rango bastante amplio que, como el informe técnico señala, coincide casi exactamente con la recomendación de la OMS, de entre una y tres veces el producto interior bruto (PIB) per cápita de los Estados Unidos en 2017 (57.000 y 171.000 dólares)<sup>13</sup>. Aparte de las controversias sobre los umbrales, la propuesta del ICER diferencia los conceptos de coste-efectividad (equivalente a «valor») en el largo plazo y de impacto presupuestario y asequibilidad (*affordability* en inglés) en el corto, y reconoce la necesaria consideración de este último criterio en las decisiones. Asimismo, establece un límite presupuestario por fármaco, promueve el análisis de escenarios y subraya la importancia de «consideraciones contextuales» tales como la gravedad de la enfermedad, el impacto en la productividad o en los cuidadores, y otros potenciales efectos no capturados por los AVAC<sup>13,14</sup>.

Como en el caso del Reino Unido, estos nuevos umbrales se alejan considerablemente del clásico umbral de 50.000 dólares por AVAC, cuyo origen se remonta a 1984 (se trata de un tema controvertido, pero parece que la cifra corresponde al coste-efectividad de la hemodiálisis hace 40 años), tan citado en la literatura, aunque en los últimos años los investigadores han utilizado de forma creciente la cifra de 100.000 dólares por AVAC en sus publicaciones<sup>15,16</sup>. Varios autores han defendido la necesidad de elevar el umbral de 50.000 dólares basándose en la inflación de estos últimos 35 años, los datos de disposición real a pagar, el valor del PIB per cápita e incluso el coste-efectividad actual de la hemodiálisis, que estaría alrededor de los 120.000 dólares por AVAC<sup>17</sup>. Asimismo, asociaciones médicas como el American College of Cardiology han fomentado la inclusión de consideraciones del valor en sus guías clínicas, subrayando la importancia de completar los clásicos métodos de graduación de la evidencia con rangos sobre el coste-efectividad incremental de las intervenciones evaluadas, y también han sugerido umbrales similares a los del ICER, de entre 50.000 y 150.000 dólares por AVAC<sup>18</sup>.

En Canadá, que junto con Australia fueron los primeros países que adoptaron formalmente el coste-efectividad como criterio importante en la financiación de medicamentos, se estableció una propuesta de umbrales de entre 20.000 y 100.000 dólares canadienses por AVAC<sup>19</sup>. En la práctica, el coste-efectividad (sin un umbral explícito) es uno más de los factores considerados en las decisiones, y se le asigna un peso muy relevante según la evidencia disponible sobre la efectividad de las intervenciones evaluadas y el resto de factores ya mencionados. En Australia no se ha definido un umbral explícito, pero a partir de las decisiones del Pharmaceutical Benefits Advisory Committee, entre 1991 y 1996, se estimó que los umbrales implícitamente utilizados podrían situarse entre 42.000 y 76.000 dólares australianos por AVAC<sup>20</sup>. En algunos países europeos, como Suecia, el límite se estableció en 500.000 coronas suecas por AVAC (aproximadamente 57.000 euros, ajustado a 2018). En Holanda, a finales de los años 1990, se partió de un límite de 20.000 euros por AVAC, pero posteriormente se establecieron nuevos límites de 50.000 y 80.000 euros por AVAC en función, sobre todo, de la «necesidad social» y de la carga sanitaria de la enfermedad<sup>20,21</sup>; una cifra no muy diferente a la disposición individual a pagar por un AVAC en Holanda<sup>22</sup>.

Otros muchos países han incorporado la evaluación económica de intervenciones sanitarias como herramienta orientadora en la toma de decisiones. A veces los umbrales no han sido explícitos, aunque han acabado siendo conocidos por los agentes que participan en los procesos de financiación y negociación del precio de innovaciones sanitarias. En la tabla 1 del artículo se encuentran los umbrales inicialmente planteados en una selección de países, así como algunas de las propuestas más recientes.

## **Métodos para determinar los umbrales de eficiencia**

Los métodos basados en la oferta y la demanda presentan algunas ventajas e inconvenientes. En principio, el umbral no debería establecerse de manera

independiente del presupuesto sanitario, por lo que el valor basado en la revelación del coste de oportunidad (oferta) parece el más adecuado, si bien requiere disponer de buenos datos sobre efectividad y costes de las intervenciones, y es técnicamente complejo. En un escenario de largo plazo, la disposición de la sociedad a pagar por un resultado en salud debería orientar tanto el umbral como el presupuesto sanitario en un marco más flexible de actuación. No obstante, los retos de este enfoque no son menores, puesto que habría que asegurarse de que la revelación de preferencias se realiza en un contexto de información completa (o lo más completa posible), evitando sesgos estratégicos en las respuestas y asegurando que la muestra elegida es representativa de la sociedad. Asimismo, la técnica de agregación de preferencias condiciona fuertemente los resultados, como veremos al revisar el amplio rango de valores obtenidos en estos ejercicios. Por tanto, aunque el concepto teórico de umbral de eficiencia parece atractivo, la estimación práctica de sus valores no es un ejercicio sencillo.

El método propuesto por la OMS, basado en el PIB per cápita, presenta importantes limitaciones, como la de suponer, sin ningún fundamento, cuál es la disposición a pagar por parte de un país, así como el hecho de ignorar el impacto presupuestario de utilizar dichas referencias<sup>23</sup>. La propuesta considera que el valor razonable de un AVAC estaría entre una y tres veces el PIB per cápita<sup>20</sup>, aunque algunos autores consideran que el límite superior es demasiado generoso<sup>24</sup> y que su aplicación sistemática pondría en peligro la sostenibilidad de la financiación de prestaciones sanitarias a largo plazo<sup>25</sup>.

Los diferentes métodos de determinación de los umbrales de eficiencia proporcionan resultados muy heterogéneos. Hay grandes diferencias en los valores estimados en los estudios empíricos, incluso dentro del mismo país, y los aspectos metodológicos son muy relevantes (supuestos y técnicas de inferencia), así como los contextos utilizados<sup>15</sup>. Dentro de los métodos empíricos, las estimaciones basadas en la disposición a pagar y su rango de variabilidad son más elevadas que las calculadas a partir de la oferta<sup>20,26</sup>. Estos hallazgos indican que es preciso seguir investigando y desarrollando trabajos empíricos que ayuden a definir el umbral más

óptimo, al tiempo que se precisa cierto grado de pragmatismo, basado en la mejor información disponible.

### **Aplicación práctica de los umbrales de eficiencia**

La fijación de umbrales explícitos presenta algunos inconvenientes. Por ejemplo, podría contribuir a que los precios fijados por el ofertante se ajustasen al alza para que la razón de coste-efectividad incremental de la intervención llegase sistemáticamente hasta la máxima disposición a pagar (el valor del umbral). Sin embargo, de la misma forma, podría ocurrir que el precio de intervenciones con un coste-efectividad incremental muy elevado se ajustase a la baja, para así poder conseguir su financiación. Esta potencial «endogenización» podría conducir a confundir el precio adecuado con aquel que hace coincidir el coste por AVAC con el del umbral o referencia, cuando el umbral no representa otra cosa que un límite superior. En ambos casos hay que tener presente quién se beneficia del excedente.

El modelo de doble umbral requiere alguna matización. El presupuesto y el umbral siempre van de la mano, de tal forma que uno siempre está condicionado por el otro. Por tanto, la lógica indica que el umbral debería ser único. Sin embargo, el concepto de «doble umbral» hace referencia a los valores mínimo y máximo que están por debajo y por encima del umbral «oculto» que se corresponde con el presupuesto disponible. Siguiendo con el ejemplo del NICE, este recomienda casi todas las intervenciones cuyo coste-efectividad está por debajo de 20.000 libras por AVAC, un determinado porcentaje de aquellas cuyo coste-efectividad está comprendido entre 20.00 y 50.000 libras por AVAC, y solo algunas en las que el coste-efectividad supera las 50.000 libras por AVAC. Esto significa que el umbral «real» (el que corresponde al presupuesto disponible y asumiendo un decisor racional) es un valor comprendido entre 20.000 y 50.000 libras por AVAC (recordemos que el NICE rechaza el 50% de las intervenciones cuyo coste-efectividad es superior a 40.000 libras por AVAC).

El valor del umbral o referencia superior también requiere algunas consideraciones. Algunos países han elevado el valor del umbral superior, probablemente para hacer confluir la teoría con las evidencias sobre las decisiones reales de financiación<sup>27</sup>, de forma que se vaya logrando la deseada convergencia entre lo que en teoría se está dispuesto a pagar por un AVAC y lo que en realidad se paga. Es necesario recordar que los límites de eficiencia más conocidos fueron establecidos hace al menos 20 años, que el nivel de precios de las economías ha aumentado en estas dos décadas y que, incluso controlando este último factor, la productividad de los sistemas sanitarios (oferta) y el valor social por un AVAC no tienen por qué ser los mismos ahora que entonces<sup>15</sup>. Los 50.000 dólares de 1982 corresponderían a 121.000 dólares en 2003 (ahora la cifra sería aún mayor)<sup>27</sup>, y las 20.000-30.000 libras por AVAC del Reino Unido corresponderían en 2015 a 42.000-64.000 libras por AVAC<sup>28</sup>. No obstante, conviene tener presente que carece de fundamento interpretar el umbral como un precio que debe ajustarse por la inflación general. El criterio de la OMS también iría a favor de la actualización del umbral superior. Por ejemplo, en 2017, el valor de tres veces el PIB per cápita era de 171.000 dólares por AVAC en los Estados Unidos y de 127.500 libras por AVAC en el Reino Unido<sup>29</sup>. En cualquier caso, con independencia de las dudas que pueden plantear los argumentos que justifican el incremento de los umbrales superiores, no pueden olvidarse la interdependencia del valor umbral y del presupuesto sanitario ni el enorme impacto que en los presupuestos sanitarios tendría la inclusión sistemática de intervenciones con un coste-efectividad cercano a los umbrales superiores. Por ello, siempre debe tenerse presente que, ante un presupuesto fijo, la recomendación de intervenciones cuyo coste-efectividad supere el umbral superior propuesto requerirá dejar de financiar otras intervenciones cuyo coste-efectividad esté por debajo del umbral inferior.

Finalmente, se observa una creciente tendencia a establecer criterios diferenciales para distintas áreas terapéuticas. El caso de los fármacos oncológicos y los medicamentos huérfanos es el más frecuente. Algunos estudios muestran que la disposición a pagar por un AVAC en el área de oncología es unas tres veces mayor que la disposición a pagar en otras áreas<sup>30</sup>. Así lo demuestran también el trabajo de

Cohen y Looney<sup>31</sup>, que sugiere que el umbral para estos fármacos se situaría en 129.000 dólares por AVAC (una cifra que, por cierto, corresponde al coste-efectividad actual de la hemodiálisis), y el estudio de Carrera e Ijzerman<sup>32</sup>, que evidencia un umbral de 138.580 dólares por AVAC para los fármacos oncológicos frente a 49.913 dólares por AVAC en el caso de los medicamentos no oncológicos. Esta diferencia en la disposición a pagar entre áreas terapéuticas es un tema extremadamente controvertido. En principio, la aplicación de excepciones no encaja con los principios de equidad y de eficiencia que sustentan las evaluaciones económicas de intervenciones sanitarias, pero algunos lo justifican aludiendo a la diferente sensibilidad de los pagadores (y quizás de la sociedad) hacia la carga que representan esas enfermedades. No obstante, ello requiere que los criterios de excepcionalidad sean declarados y conocidos (principios de transparencia y rendición de cuentas), y que no se basen en meras opiniones sino en evidencias derivadas de estudios que traten de revelar las preferencias de la sociedad hacia dichos criterios y se hagan explícitos en los procesos deliberativos.

## **Bibliografía**

1. Devlin N, Parkin D. Does NICE have a cost-effectiveness threshold and what other factors influence its decisions? A binary choice analysis. *Health Econ.* 2004;13:437-52.
2. McCabe C, Claxton K, Culyer AJ. The NICE cost-effectiveness threshold. What it is and what that means. *Pharmacoeconomics.* 2008;26:733-44.
3. Dakin H, Devlin N, Feng Y, et al. The influence of cost-effectiveness and other factors on NICE decisions. *Health Econ.* 2015;24:1256-71.
4. NICE. Appraising life-extending, end of life treatments. NICE; 2009.
5. Dillon A, Landells LJ. NICE, the NHS, and cancer drugs. *JAMA.* 2018;319:767-8.
6. Weinstein MC. A QALY is a QALY\_or is it? *J Health Econ.* 1988;7:289-90.

7. Culyer AJ. Ethics, priorities and cancer. *J Cancer Policy*. 2017;11:6-11.
8. NICE. Changes to NICE drug appraisals: what you need to know. NICE; 2017.
9. Paulden M. Recent amendments to NICE's value-based assessment of health technologies: implicitly inequitable? *Exp Rev Pharmacoecon Out Res*. 2017;3:239-42.
10. Claxton K, Martin S, Soares M, et al. Methods for the estimation of the NICE cost effectiveness threshold. *Health Technol Assess*. 2015;19:1-503, v-vi.
11. Neumann PJ, Sanders GD. Cost-effectiveness analysis 2.0. *N Engl J Med*. 2017;376:203-5.
12. Neumann PJ, Weinstein MC. Legislating against use of cost-effectiveness information *N Engl J Med*. 2010;363:1495-7.
13. Institute for Clinical and Economic Review. Overview of the ICER assessment framework and update for 2017-2019. Disponible en: <http://icer-review.org/wp-content/uploads/2017/06/ICER-value-assessment-framework-Updated-050818.pdf>.
14. Neumann PJ, Cohen JT. ICER's revised value assessment framework for 2017-2019: a critique. *PharmacoEconomics*. 2017;35:977-80.
15. Neumann PJ, Cohen JT, Weinstein MC. Updating cost-effectiveness. The curious resilience of the \$50,000-per QALY threshold. *N Engl J Med*. 2014;371:796-7.
16. Nuijten MJC, Dubois DJ. Cost-utility analysis: current methodological issues and future perspectives. *Frontiers Pharmacol*. 2011;2:1-5.
17. Ubel PA. What is the price of life and why doesn't it increase at the rate of inflation? *Arch Intern Med*. 2003;163:1637-41.
18. Anderson JL, Heidenreich PA, Barnett PG et al. ACC/AHA statement on cost/value methodology in clinical practice guidelines and performance measures: a report of the American College of Cardiology/American Heart Association Task Force on Performance Measures and Task Force on Practice Guidelines. *J Am Coll Cardiol*. 2014;63:2304-22.

19. Laupacis A, Feeny D, Detsky AS, et al. How attractive does a new technology have to be to warrant adoption and utilization? Tentative guidelines for using clinical and economic evaluations. *Can Med Assoc J*. 1992;146:473-81.
20. Simoens S. How to assess the value of medicines? *Frontiers Pharmacol*. 2010;1:1-8.
21. Reckers-Droog VT, van Exel NJA, Brower WBF. Looking back and moving forward: on the application of proportional shortfall in health priority setting in the Netherlands. *Health Policy*. 2018;122:621-9.
22. Bobinac A, van Exel J, Rutten FH, et al. The value of a QALY: individual willingness to pay for health gains under risk. *Pharmacoeconomics*. 2014;32:75-86.
23. Marseille E, Larson B, Kazi DS, et al. Thresholds for the cost-effectiveness of interventions: alternative approaches. *Bull World Health Organ*. 2015;93:118-24.
24. Woods B, Revill P, Sculpher M, et al. Country-level cost-effectiveness thresholds: initial estimates and the need for further research. *Value Health*. 2016;19:929-35.
25. Bertram MY, Lauer JA, De Joncheere K, et al. Cost-effectiveness thresholds: pros and cons. *Bull World Health Org*. 2016;94:925-30.
26. Vallejo-Torres L, García-Lorenzo B, Castilla I, et al. On the estimation of the cost-effectiveness threshold: why, what and how? *Value Health*. 2016;19:558-66.
27. Braithwaite RS, Meltzer DO, King JT, et al. What does the value of modern medicines say about the \$ 50,000 per quality-adjusted life year decision rule? *Med Care*. 2008;46:349-55.
28. Appleby J. Crossing the line: NICE's value for money thresholds. *BMJ*. 2016;252:i1336.
29. The World Bank. GDP per capita (current US\$). Disponible en: <http://data.worldbank.org/indicator/NY.GDP.PCAP.CD>
30. Bae YHJ, Mullins CD. Do value thresholds for oncology drugs differ from nononcology drugs? *J Manag Care Spec Pharmacy*. 2014;20:1086-92.
31. Cohen J, Looney W. What is the value of oncology medicines? *Nat Biotechnol*. 2010;28:1160-3.

32. Carrera P, Ijzerman MJ. Are current ICER thresholds outdated? Valuing medicines in the era of personalized healthcare. *Exp Rev Pharmacoecon Out Res.* 2016;16:435-7.
